# Supplementary material
Source: MDPI journal article supplement (https://www.mdpi.com/1999-4907/11/3/278)
Supplement: s1 [file s1]

## Supplementary Materials

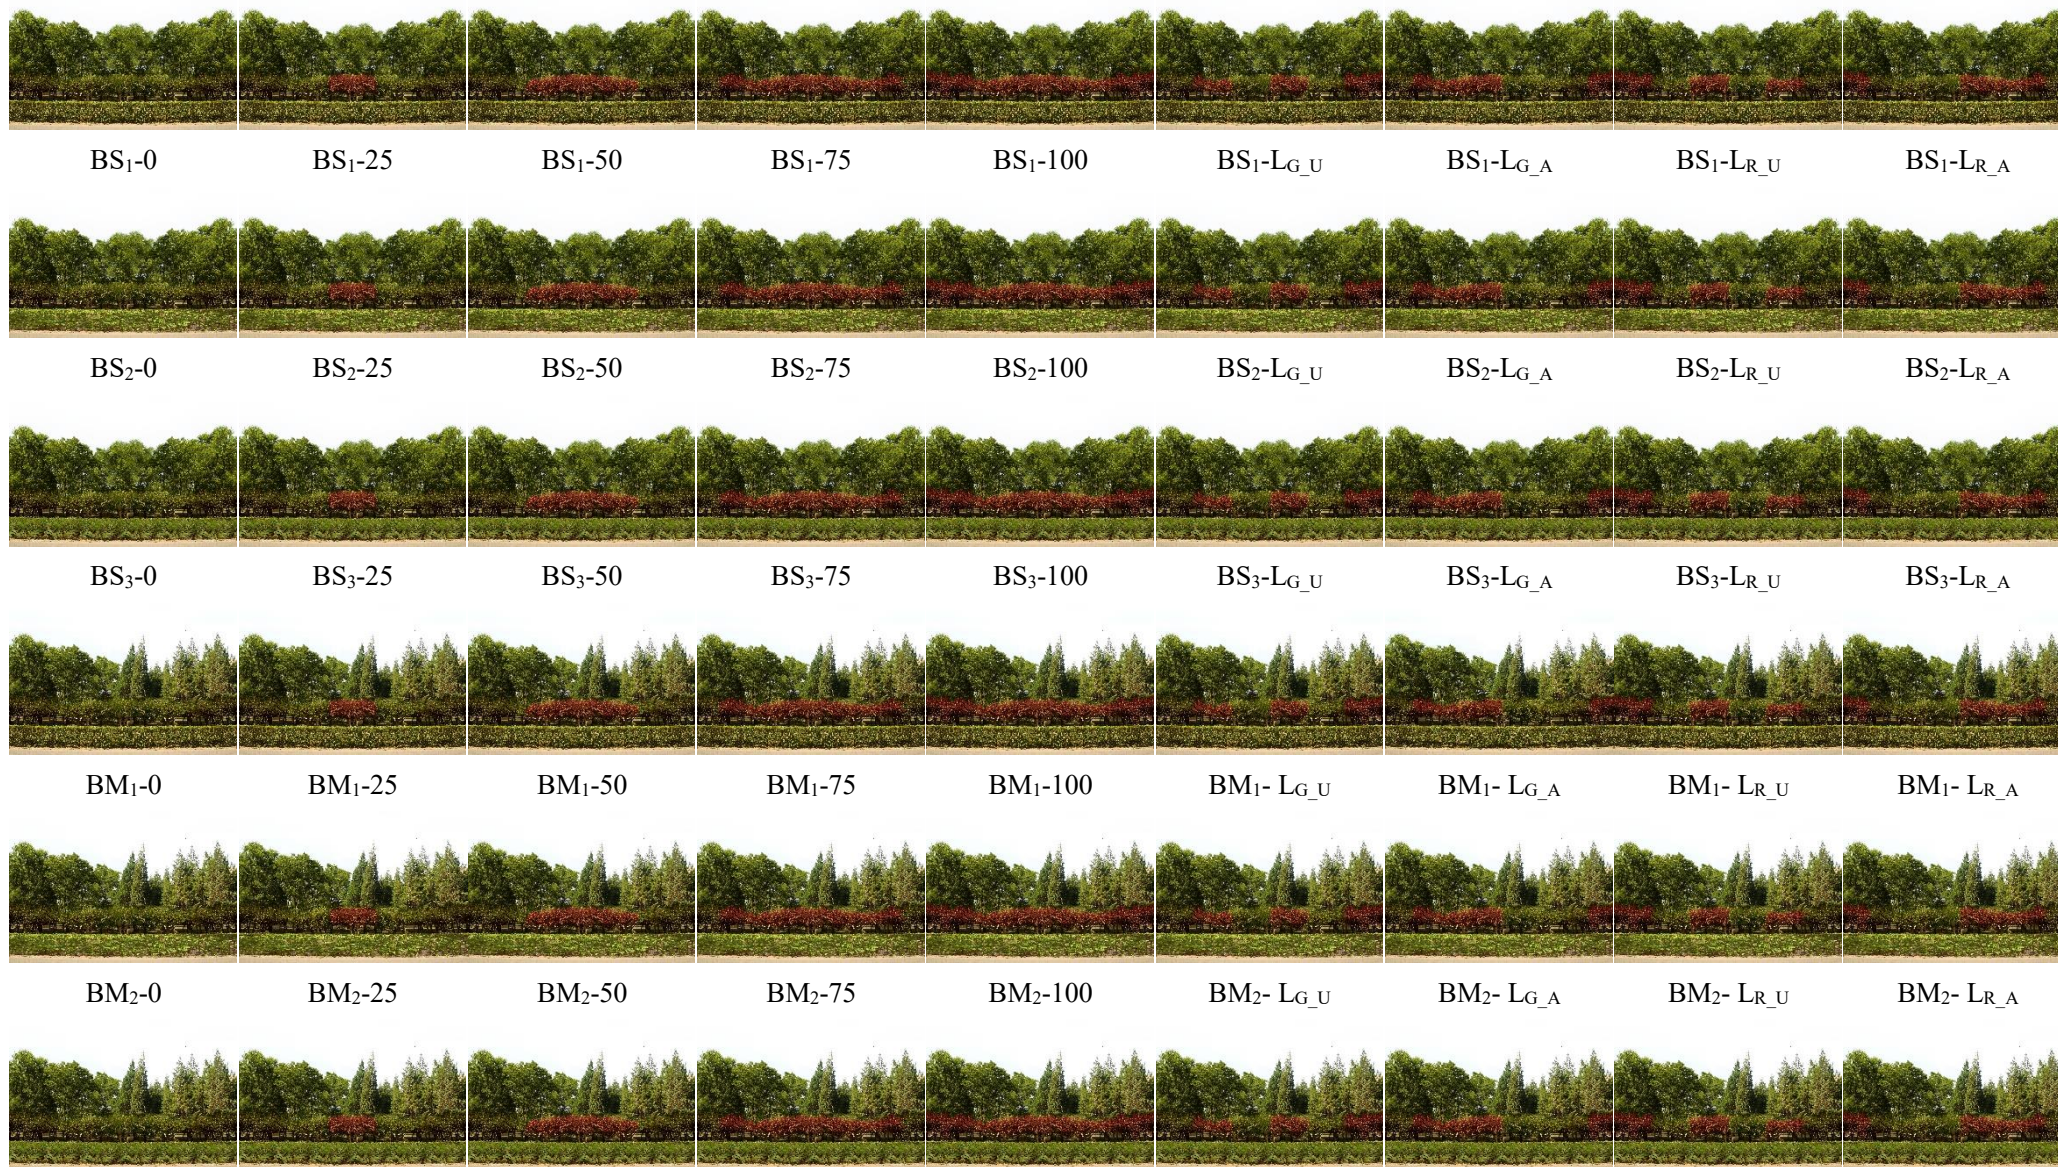

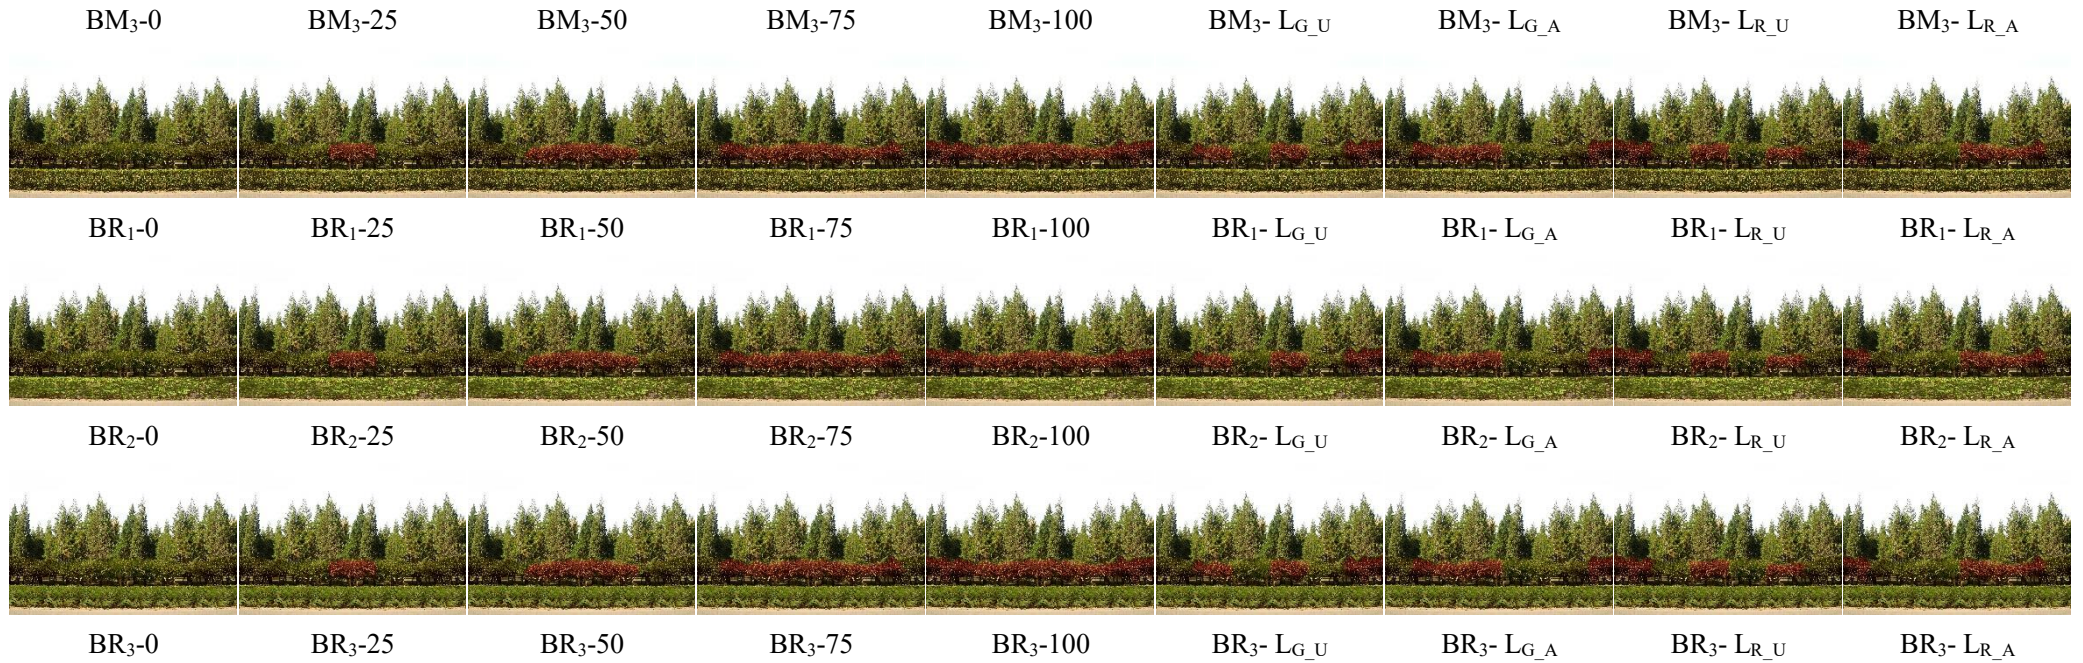

**Figure S1:** The original pictures with all elements in green of different backgrounds and foregrounds and a consistent midground. Background (B) varied by landscape texture type through soft (S) with *Sophora japonica*, rigid (R) with *Juniperus chinensis*, or mixed (M) with soft and rigid texture trees; midground plants were *Prunus cerasifera* in all images; and foreground plant types were *Euonymus japonicus* (1), *Hosta plantaginea* (2), or *Iris tectorum* (3). C<sub>25</sub> accounts for 25% red of the mid-view; C<sub>50</sub> accounts for 50% red of the midground; C<sub>75</sub> accounts for 75% red of the midground; C<sub>100</sub> accounts for 100% red of the midground. L<sub>R\_U</sub>, red patch was set discontinuously and uniformly; L<sub>R\_A</sub>, red patch was set discontinuously and non-uniformly; L<sub>G\_U</sub>, green patch was set discontinuously and uniformly; L<sub>G\_A</sub>, green patch was set discontinuously and non-uniformly. Thus, the BM<sub>1</sub>-25 was a mixed background and *Euonymus japonicus* in the foreground and changing 25% color of midground from green to red.
